# Supplementary material
Source: ML conference proceedings conference paper supplement (https://openreview.net/forum?id=T62TYoF8R3)
Supplement: supplementary_material [file supp-6707.pdf › supp-6707.pdf]

1

# FPSAttention Supplementary Material

2

## Contents

|    |                                                                                     |          |
|----|-------------------------------------------------------------------------------------|----------|
| 3  | <b>A Implementation Details</b>                                                     | <b>2</b> |
| 4  | A.1 FPSAttention Algorithm . . . . .                                                | 2        |
| 5  | A.2 Additional Implementation Details . . . . .                                     | 3        |
| 6  | A.3 Ablation Study: Challenges of Naive Quantization and Sparsity Combination . . . | 3        |
| 7  | A.4 VBench Full Evaluation Results . . . . .                                        | 5        |
| 8  | A.5 Clarification on vBench Evaluation Metrics . . . . .                            | 5        |
| 9  | A.6 Training Hyperparameters . . . . .                                              | 5        |
| 10 | <b>B Limitation and Societal Impacts</b>                                            | <b>6</b> |
| 11 | <b>C Visualization</b>                                                              | <b>8</b> |

## 13 A Implementation Details

### 14 A.1 FPSAttention Algorithm

15 Algorithm 1 presents the core computational workflow of our FPSAttention method, which imple-  
 16 ments joint tile-wise FP8 quantization with structured sparse attention and denoising step-aware  
 17 adaptation. The algorithm follows the methodology described in the main paper, incorporating tile-  
 18 wise quantization for queries and keys, channel-wise quantization for values, tensor-wise quantization  
 19 for attention weights, and dynamic adaptation based on denoising timesteps.

---

#### Algorithm 1 FPSAttention: Joint Tile-wise FP8 Quantization and Sparse Attention

---

**Require:** Input tensors  $Q, K, V \in \mathbb{R}^{L \times d}$ , denoising step  $t$ , diffusion steps  $D$   
**Require:** Transition points  $\alpha_1, \alpha_2$ , quantization granularities  $\{g_{\text{coarse}}, g_{\text{fine}}, g_{\text{intermediate}}\}$   
**Require:** Window sizes  $\{W_{\text{sparse}}, W_{\text{dense}}, W_{\text{medium\_density}}\}$ , tile scheme  $\mathcal{T}$   
**Ensure:** Output tensor  $X \in \mathbb{R}^{L \times d}$  (BF16/FP16)

- 1: // 1. Denoising Step-aware Parameter Selection
- 2:  $t_1 \leftarrow \alpha_1 \cdot D, t_2 \leftarrow \alpha_2 \cdot D$
- 3: **if**  $t \leq t_1$  **then**
- 4:    $g(t) \leftarrow g_{\text{coarse}}, W(t) \leftarrow W_{\text{sparse}}$  // Early steps
- 5: **else if**  $t_1 < t \leq t_2$  **then**
- 6:    $g(t) \leftarrow g_{\text{fine}}, W(t) \leftarrow W_{\text{dense}}$  // Mid steps
- 7: **else**
- 8:    $g(t) \leftarrow g_{\text{intermediate}}, W(t) \leftarrow W_{\text{medium\_density}}$  // Late steps
- 9: **end if**
- 10: // 2. Tile-wise FP8 Quantization for Q and K
- 11: Partition  $Q, K$  into tiles  $\{\mathcal{T}_u\}$  with granularity  $g(t)$
- 12: **for** each tile  $\mathcal{T}_u$  **do**
- 13:    $s_u^Q \leftarrow \max_{(i,j) \in \mathcal{T}_u} |Q_{i,j}| / M_{\text{FP8\_max}}$
- 14:    $s_u^K \leftarrow \max_{(i,j) \in \mathcal{T}_u} |K_{i,j}| / M_{\text{FP8\_max}}$
- 15:    $\hat{Q}_{i,j} \leftarrow \text{FP8}(Q_{i,j}; s_u^Q)$  for  $(i, j) \in \mathcal{T}_u$
- 16:    $\hat{K}_{i,j} \leftarrow \text{FP8}(K_{i,j}; s_u^K)$  for  $(i, j) \in \mathcal{T}_u$
- 17: **end for**
- 18: // 3. Channel-wise FP8 Quantization for V
- 19: **for** each channel  $j \in \{1, \dots, d\}$  **do**
- 20:    $s_j^V \leftarrow \max_{i \in L} |V_{i,j}| / M_{\text{FP8\_max}}$
- 21:    $\hat{V}_{i,j} \leftarrow \text{FP8}(V_{i,j}; s_j^V)$  for all  $i$
- 22: **end for**
- 23: // 4. Structured Sparse Attention Computation via FlexAttention
- 24: Define neighborhood  $\mathcal{W}(u)$  based on window size  $W(t)$ :
- 25:  $\mathcal{W}(u) = \{v : \|c_u - c_v\|_\infty \leq (W_t/(2T_t), W_h/(2T_h), W_w/(2T_w))\}$
- 26: // Configure FlexAttention mask and score modification functions
- 27: Define  $\text{mask\_mod}(b, h, q, k) = \text{True}$  if  $\text{tile}(q) \in \mathcal{W}(\text{tile}(k))$ , **False** otherwise
- 28: Define  $\text{score\_mod}(S, b, h, q, k) = S$  // Identity for quantized inputs
- 29: // Execute FlexAttention with quantized inputs and custom modifications
- 30:  $\hat{X} \leftarrow \text{FlexAttention}(\hat{Q}, \hat{K}, \hat{V}, \text{score\_mod}, \text{mask\_mod})$
- 31: // 5. Dequantize Output to Target Precision
- 32:  $X \leftarrow \text{Dequantize}(\hat{X})$  // Dequantize to BF16/FP16
- return**  $X$

---

### 20 Key Algorithmic Components

21 The algorithm implements the four core innovations described in the main paper:



- **Denoising Step-aware Adaptation:** Lines 2-8 implement the adaptive scheduling strategy from Equation 6 in the main paper, dynamically adjusting quantization granularity  $g(t)$  and sparsity window size  $W(t)$  based on the current denoising step  $t$ .
- **Tile-wise FP8 Quantization for Q and K:** Lines 10-15 partition queries and keys into 3D tiles with step-dependent granularity and compute per-tile scaling factors  $s_u^Q$  and  $s_u^K$  to minimize quantization error within each tile.
- **Channel-wise FP8 Quantization for V:** Lines 17-20 apply channel-wise quantization to the value matrix, preserving fine-grained channel information that is critical for generation quality.
- **FlexAttention-based Sparse Attention:** Lines 22-26 implement structured sparse attention using FlexAttention’s `mask_mod` and `score_mod` interfaces, enabling hardware-optimized execution with tile-wise sparsity patterns that generate exactly  $M \times |\mathcal{W}(u)|$  dense attention blocks.
- **Output Dequantization:** Line 28 dequantizes the FlexAttention output to the target precision (BF16/FP16) to maintain compatibility with the downstream network components.

This implementation ensures full compatibility with the theoretical framework while enabling practical hardware acceleration through structured computation patterns and optimal memory access patterns.

## A.2 Additional Implementation Details

**Models.** We implement and evaluate FPSAttention on the Wan architecture [5], leveraging both 1.3B and 13B parameter variants to demonstrate scalability. The Wan models feature a DiT backbone with cross-attention for text conditioning and temporal attention for inter-frame modeling. Our implementation maintains architectural fidelity while seamlessly integrating FP8 quantization for attention. Especially, we used the E4M3 formats for FP8 quantization for attention. The joint quantization and sparsity mechanisms are realized through FlexAttention’s score and mask modification interfaces, with the resulting fused kernels compiled via Triton for optimal execution on Hopper architectures.

**Hardware.** Experiments utilize a distributed computing cluster with high-performance GPU nodes, each containing 192 CPU cores, 960GB system memory, and 8×NVIDIA H20 GPUs (96GB each). InfiniBand interconnects ensure high-bandwidth inter-node communication for distributed training. Training scales from 16 nodes (1.3B model) to 64 nodes (13B model), requiring approximately 7 days. We trained around 6000 iterations per configuration to achieve convergence.

**Dataset.** Training employs a curated high-quality video dataset processed through a comprehensive filtering pipeline. The preprocessing workflow includes automated subtitle removal, black-border cropping, and monochrome video exclusion, followed by quality-based filtering using established metrics (Q-Align > 3.5, Aesthetic Score > 2.0, optical flow magnitude 0.05–2.0). After deduplication, videos are standardized to 480p resolution, 16fps frame rate, and 5-second duration to optimize the computational efficiency-quality balance across both model scales.

**Evaluation.** Performance assessment utilizes the VBench benchmark [2], following established protocols [3, 12] with 5-video sampling per prompt. Evaluation encompasses 16 comprehensive VBench dimensions covering aesthetic quality, temporal consistency, motion dynamics, and semantic understanding. Additional quantitative metrics include PSNR [1], SSIM [6], and LPIPS [11] to provide multi-faceted quality assessment.

**Baselines.** Our comparative analysis includes representative approaches from three categories: (1) sparsity-based methods (SparseVideoGen [7], STA [10]), (2) quantization-focused techniques (SageAttention [8]), and (3) joint optimization methods (SpargAttn [9]). This selection enables comprehensive evaluation of FPSAttention against both specialized single-optimization approaches and competing joint methods, providing a thorough assessment of our framework’s relative performance and efficiency gains.

## A.3 Ablation Study: Challenges of Naive Quantization and Sparsity Combination

To validate our core motivation that naive combination of FP8 quantization and sparsity presents significant challenges, we conduct a comprehensive ablation study comparing three key approaches:

(1) the baseline full-precision model, (2) a training-free naive combination of quantization and sparsity, and (3) our proposed FPSAttention method with joint optimization. This comparison directly addresses the fundamental tension between quantization and sparsity mechanisms discussed in the main paper.

Table A presents a detailed comparison across all VBench metrics for the Wan 1.3B model. The training-free approach applies standard FP8 quantization and sparse attention patterns without joint optimization or denoising step-aware adaptation. As hypothesized, this naive combination leads to substantial performance degradation across nearly all evaluation metrics.

Table A: Ablation study demonstrating the challenges of naive quantization and sparsity combination. We compare baseline full-precision (Baseline), training-free naive combination (Training-Free), and our joint optimization approach (FPSAttention) on Wan 1.3B across all VBench metrics. The severe degradation in the training-free approach validates the need for holistic joint optimization.

| Metric                  | Baseline      | Training-Free | FPSAttention  |
|-------------------------|---------------|---------------|---------------|
| Aesthetic Quality       | 0.6105        | 0.2892        | <b>0.6240</b> |
| Appearance Style        | 0.7157        | 0.7874        | <b>0.7252</b> |
| Background Consistency  | <b>0.9503</b> | 0.9280        | 0.9156        |
| Color                   | 0.9049        | 0.4836        | <b>0.8932</b> |
| Dynamic Degree          | 0.3014        | 0.3750        | <b>0.4195</b> |
| Human Action            | 0.7720        | 0.0200        | <b>0.7780</b> |
| Imaging Quality         | 0.6708        | 0.6868        | <b>0.7103</b> |
| Motion Smoothness       | 0.9527        | 0.9513        | 0.9413        |
| Multiple Objects        | 0.6091        | 0.0000        | <b>0.6665</b> |
| Object Class            | 0.7710        | 0.0109        | <b>0.8185</b> |
| Overall Consistency     | 0.6453        | 0.1206        | <b>0.6893</b> |
| Quality Score           | 0.8332        | 0.7473        | <b>0.8428</b> |
| Scene                   | 0.3030        | 0.0129        | <b>0.3870</b> |
| Semantic Score          | 0.6768        | 0.1733        | <b>0.7088</b> |
| Spatial Relationship    | 0.7317        | 0.0008        | <b>0.7659</b> |
| Subject Consistency     | 0.9457        | 0.8887        | 0.9338        |
| Temporal Flickering     | <b>0.9844</b> | 0.9401        | 0.9336        |
| Temporal Style          | 0.6382        | 0.1239        | <b>0.6558</b> |
| <b>Total Score</b>      | 0.8019        | 0.6325        | <b>0.8160</b> |
| <b>Performance Drop</b> | —             | <b>-21.1%</b> | <b>+1.8%</b>  |

**Key Findings:** The results clearly demonstrate the challenges inherent in naive quantization and sparsity combination:

- **Severe Quality Degradation:** The training-free approach achieves only 0.6325 total score compared to the baseline’s 0.8019, representing a substantial 21.1% performance drop.
- **Critical Failure Modes:** Several metrics show near-zero performance in the training-free approach, including Human Action (0.02), Multiple Objects (0.0), Object Class (0.011), and Spatial Relationship (0.0008), indicating complete failure in complex semantic understanding tasks.
- **Magnified Quantization Errors:** As predicted by our theoretical analysis, sparsity mechanisms amplify quantization errors in high-magnitude attention scores. This is particularly evident in metrics requiring fine-grained semantic understanding, where the interaction between quantization noise and sparse token selection leads to catastrophic information loss.
- **Joint Optimization Success:** In contrast, our FPSAttention approach not only avoids the degradation seen in naive combination but actually improves upon the baseline (0.8160 vs 0.8019, +1.8% improvement), validating the effectiveness of our denoising step-aware joint optimization strategy.

This ablation study emphasizes the necessity of our training-aware co-design scheme.

#### 98 A.4 VBench Full Evaluation Results

99 Tables B and C present comprehensive evaluation results of our method compared to various base-  
100 lines on VBench for Wan 1.3B and Wan 13B models, respectively. These results demonstrate the  
101 effectiveness of our joint FP8 quantization and sparsity approach across multiple video quality  
102 metrics.

103 Table B shows performance comparisons across seven methods on the Wan 1.3B model: the base-  
104 line (Base), SageAttention (SageAtt) [8], SpargeAttention (SpargeAtt) [9], SparseVideoGen (Spar-  
105 seVG) [7], Sliding Tile Attention (STA) [10], our quantization-only variant (Ours-Q), and our full  
106 joint quantization and sparsity method (Ours-Q+S). The evaluation covers 18 comprehensive metrics  
107 including aesthetic quality, motion dynamics, temporal consistency, and semantic understanding.  
108 Our full method (Ours-Q+S) achieves the highest total score of 0.8160, demonstrating superior  
109 performance compared to methods that apply quantization or sparsity independently.

110 Table C presents similar comparisons for the larger 13B model, where our method continues to  
111 achieve competitive performance while providing substantial computational savings. The results  
112 validate that our approach scales effectively to larger model sizes while maintaining video generation  
113 quality across diverse evaluation criteria.

#### 114 A.5 Clarification on vBench Evaluation Metrics

115 In this study, we observed that some of the baseline methods we reproduced (including some of our  
116 own exploratory experiments prior to FPSAttention) might yield VBench scores slightly lower than  
117 those reported in their respective official publications. We attribute this primarily to the following  
118 factors: Randomness: The inherent stochasticity in video generation models can lead to slight  
119 variations in results and vBench scores across multiple runs, even with identical settings. Prompt  
120 Extension: Many prior works [4] may employ specific prompt extension strategies to enrich input  
121 prompts. This can influence the content and quality scores of the generated videos. We didn’t employ  
122 this optimization. Classifier-Free Guidance (CFG) Scale and Other Sampling Strategies: Different  
123 CFG scale values and other sampling parameters (e.g., number of sampling steps) significantly  
124 impact generation quality. While we endeavored to follow the descriptions in the respective baseline  
125 papers, subtle parameter differences might still exist. It is worth noting that similar observations  
126 have been made in other research. For instance, in the work on Sliding Tile Attention (STA) [10],  
127 their reproduced HunyuanVideo baseline also exhibited lower VBench performance compared to  
128 VBench’s official leaderboard. Despite these potential metric variations, we emphasize that all  
129 methods in this study (including our FPSAttention and all compared baselines) were evaluated  
130 under an identical VBench evaluation pipeline and parameter settings, ensuring a fair comparison.  
131 Our primary research objective is to demonstrate the significant inference speedup achieved by  
132 FPSAttention while maintaining comparable (or superior) generation quality relative to baseline  
133 methods.

134 The results demonstrate that our joint FP8 quantization and sparsity approach achieves competitive  
135 or superior performance compared to specialized methods focusing solely on either quantization or  
136 sparsity. For the Wan 1.3B model, our method achieves the highest total score (0.8160), outperforming  
137 the baseline (0.8019) while providing significant computational benefits. Similarly, for the Wan 13B  
138 model, our approach performs on par with the best-performing methods while offering substantial  
139 memory and compute savings through the combination of quantization and structured sparsity.

#### 140 A.6 Training Hyperparameters

141 Table D presents the key hyperparameters used in our experiments for both Wan 1.3B and 13B model  
142 training configurations. These hyperparameters were carefully selected to balance training stability,  
143 convergence speed, and final model performance while accommodating the constraints imposed by  
144 FP8 quantization and structured sparsity.

Table B: Performance comparison of different methods on Wan 1.3B across VBench metrics. We compare the baseline (Base), SageAttention (SageAtt), SpargeAttention (SpargeAtt), SparseVideoGen (SparseVG), Sliding Tile Attention (STA), our quantization-only variant (Ours-Q), and our full joint method (Ours-Q+S). Bold values indicate the best performance for each metric.

| Metric                 | Base          | SageAtt | SpargeAtt | SparseVG      | STA    | Ours-Q        | Ours-Q+S      |
|------------------------|---------------|---------|-----------|---------------|--------|---------------|---------------|
| Aesthetic Quality      | 0.6105        | 0.6104  | 0.5668    | 0.563         | 0.5661 | 0.6091        | <b>0.624</b>  |
| Appearance Style       | 0.7157        | 0.715   | 0.7744    | 0.2253        | 0.7952 | 0.6922        | <b>0.7252</b> |
| Background Consistency | <b>0.9503</b> | 0.95    | 0.9123    | 0.9525        | 0.9284 | 0.9472        | 0.9156        |
| Color                  | 0.9049        | 0.8866  | 0.8903    | 0.9037        | 0.8974 | <b>0.9146</b> | 0.8932        |
| Dynamic Degree         | 0.3014        | 0.307   | 0.3222    | <b>0.7139</b> | 0.5722 | 0.3222        | 0.4195        |
| Human Action           | 0.772         | 0.75    | 0.734     | 0.73          | 0.622  | 0.75          | <b>0.778</b>  |
| Imaging Quality        | 0.6708        | 0.6699  | 0.6541    | 0.6729        | 0.6626 | 0.6798        | <b>0.7103</b> |
| Motion Smoothness      | 0.9527        | 0.9527  | 0.9139    | <b>0.9726</b> | 0.9649 | 0.9496        | 0.9413        |
| Multiple Objects       | 0.6091        | 0.5837  | 0.4715    | 0.471         | 0.4043 | 0.6011        | <b>0.6665</b> |
| Object Class           | 0.7710        | 0.7695  | 0.6859    | 0.6935        | 0.5818 | 0.7851        | <b>0.8185</b> |
| Overall Consistency    | 0.6453        | 0.6451  | 0.6492    | <b>0.6935</b> | 0.6236 | 0.6478        | 0.6893        |
| Quality Score          | 0.8332        | 0.8337  | 0.8049    | 0.2336        | 0.7994 | 0.8363        | <b>0.8428</b> |
| Scene                  | 0.3030        | 0.3092  | 0.2192    | 0.1732        | 0.1995 | 0.3200        | <b>0.3870</b> |
| Semantic Score         | 0.6768        | 0.6704  | 0.6412    | 0.6342        | 0.6012 | 0.6780        | <b>0.7088</b> |
| Spatial Relationship   | 0.7317        | 0.7364  | 0.7217    | 0.6469        | 0.6863 | 0.7438        | <b>0.7659</b> |
| Subject Consistency    | 0.9457        | 0.9453  | 0.8982    | 0.9292        | 0.8993 | <b>0.9458</b> | 0.9338        |
| Temporal Flickering    | <b>0.9844</b> | 0.9841  | 0.9647    | 0.9883        | 0.9652 | 0.9822        | 0.9336        |
| Temporal Style         | 0.6382        | 0.6385  | 0.6247    | 0.2265        | 0.6005 | 0.6475        | <b>0.6558</b> |
| <b>Total Score</b>     | 0.8019        | 0.8011  | 0.7722    | 0.7827        | 0.7597 | 0.8046        | <b>0.8160</b> |

Table C: Performance comparison of different methods on Wan 13B across VBench metrics. We compare the baseline (Base), SageAttention (SageAtt), SpargeAttention (SpargeAtt), SparseVideoGen (SparseVG), Sliding Tile Attention (STA), and our full joint method (Ours-Q+S). Bold values indicate the best performance for each metric.

| Metric                 | Base          | SageAtt       | SpargeAtt | SparseVG      | STA           | Ours-Q+S      |
|------------------------|---------------|---------------|-----------|---------------|---------------|---------------|
| Aesthetic Quality      | 0.6204        | 0.6209        | 0.5875    | 0.6246        | 0.6033        | <b>0.624</b>  |
| Appearance Style       | 0.2164        | 0.2163        | 0.7586    | 0.2306        | 0.2303        | 0.2073        |
| Background Consistency | <b>0.9691</b> | 0.9687        | 0.9355    | 0.9589        | 0.9573        | 0.9377        |
| Color                  | 0.8879        | 0.8825        | 0.8768    | 0.8883        | 0.8814        | <b>0.8932</b> |
| Dynamic Degree         | 0.6944        | 0.7028        | 0.6028    | 0.6806        | 0.7028        | <b>0.8389</b> |
| Human Action           | 0.796         | 0.8           | 0.78      | 0.816         | 0.778         | <b>0.816</b>  |
| Imaging Quality        | 0.6715        | 0.6724        | 0.635     | 0.6868        | 0.6577        | <b>0.7103</b> |
| Motion Smoothness      | 0.9828        | 0.9828        | 0.9413    | 0.982         | 0.9714        | <b>0.9804</b> |
| Multiple Objects       | 0.6627        | 0.6477        | 0.6066    | 0.7012        | 0.6576        | 0.666         |
| Object Class           | 0.8299        | 0.8312        | 0.7896    | <b>0.8712</b> | 0.81          | 0.8185        |
| Overall Consistency    | 0.6912        | 0.6912        | 0.6975    | 0.708         | 0.6893        | 0.6893        |
| Quality Score          | 0.6577        | <b>0.8428</b> | 0.8134    | 0.7421        | 0.8246        | 0.7103        |
| Scene                  | 0.3669        | 0.3049        | 0.3495    | <b>0.4129</b> | 0.3387        | 0.3182        |
| Semantic Score         | <b>0.7572</b> | 0.7091        | 0.6969    | 0.7421        | 0.7077        | 0.7088        |
| Spatial Relationship   | 0.7364        | 0.7405        | 0.7526    | <b>0.8056</b> | 0.7405        | 0.7661        |
| Subject Consistency    | 0.9528        | 0.953         | 0.9173    | 0.9489        | 0.953         | 0.9435        |
| Temporal Flickering    | <b>0.9922</b> | <b>0.9922</b> | 0.969     | 0.9891        | <b>0.9922</b> | 0.9754        |
| Temporal Style         | 0.2408        | 0.2408        | 0.6607    | 0.2438        | 0.2408        | <b>0.6558</b> |
| <b>Total Score</b>     | 0.8153        | 0.8158        | 0.7901    | <b>0.8196</b> | 0.8012        | 0.816         |

## 145 B Limitation and Societal Impacts

146 **Limitations.** While FPSAttention demonstrates strong performance across our evaluation scenarios,  
147 there are some considerations for broader adoption. Our approach works best with modern FP8-  
148 capable GPUs such as NVIDIA Hopper architectures, though it can still provide benefits on older  
149 hardware with reduced FP8 acceleration. The method benefits from quantization-aware training to  
150 achieve optimal results, which involves a moderate increase in training time compared to post-training  
151 quantization approaches. The denoising step-aware scheduling includes several hyperparameters

Table D: Comprehensive hyperparameter configuration for Wan 1.3B and 13B model training and evaluation. The table covers model architecture specifications, training parameters, diffusion scheduler settings, data configuration, and system-level precision settings used in our experiments.

| Category                      | Parameter                 | Wan 1.3B     | Wan 13B              |
|-------------------------------|---------------------------|--------------|----------------------|
| <b>Model Architecture</b>     | Model Type                | WanX21FPS    | <b>WanX21FPS-13B</b> |
|                               | Model Dimension           | 1536         | <b>5120</b>          |
|                               | Number of Layers          | 30           | <b>40</b>            |
|                               | Number of Heads           | 12           | <b>40</b>            |
|                               | FFN Dimension             | 8960         | <b>13824</b>         |
|                               | Input/Output Dimension    | 16           | 16                   |
|                               | Frequency Dimension       | 256          | 256                  |
|                               | Text Dimension            | 4096         | 4096                 |
|                               | Patch Size                | [1, 2, 2]    | [1, 2, 2]            |
| <b>Training</b>               | Learning Rate             | 5e-6         | 5e-6                 |
|                               | Weight Decay              | 1e-4         | 1e-4                 |
|                               | Gradient Clipping         | 1.0          | 1.0                  |
|                               | Warmup Steps              | 200          | 200                  |
|                               | EMA Decay                 | 0.99         | 0.99                 |
|                               | Adam Epsilon              | 1e-15        | 1e-15                |
| <b>Diffusion Scheduler</b>    | Scheduler Type            | rflow-wanx   | rflow-wanx           |
|                               | Number of Timesteps       | 1000         | 1000                 |
|                               | Sample Steps              | 50           | 50                   |
|                               | CFG Scale                 | 5.0          | 5.0                  |
|                               | Sample Shift              | 5.0          | 5.0                  |
|                               | Transform Scale           | 5.0          | 5.0                  |
|                               | Sample Method             | logit-normal | logit-normal         |
| <b>Data &amp; Sequence</b>    | Text Length               | 512          | 512                  |
|                               | Max Sequence Length       | 75600        | 75600                |
|                               | Sample FPS                | 16           | 16                   |
|                               | Video Resolution          | 480p         | 480p                 |
|                               | Video Duration            | 5s           | 5s                   |
|                               | Prompt Uncond Probability | 0.1          | 0.1                  |
| <b>System &amp; Precision</b> | Data Type                 | fp8          | fp8                  |
|                               | Training Mode             | FSDP         | FSDP                 |
|                               | Gradient Checkpointing    | True         | True                 |
|                               | Quantization              | True         | True                 |
|                               | Sequence Parallel Degree  | 1            | <b>4</b>             |

(transition points  $\alpha_1$  and  $\alpha_2$ , quantization granularities, and window sizes) that can be optimized for different model architectures and datasets. Our current evaluation focuses on the Wan2.1 architecture, and the approach shows strong promise for extension to other video diffusion transformer architectures (e.g., HunyuanVideo, CogVideoX). Additionally, while our tile-wise approach achieves good hardware utilization across tested configurations, there are opportunities for architecture-specific optimization to further improve performance on different GPU memory hierarchies.

**Societal Impacts.** The acceleration techniques presented in FPSAttention have both positive and potentially concerning societal implications. On the positive side, our work democratizes access to high-quality video generation by significantly reducing computational requirements, enabling broader adoption of video diffusion models for creative applications, education, and accessibility tools. The substantial speedups (up to 4.96x end-to-end acceleration) can reduce energy consumption and carbon footprint associated with video generation, contributing to more sustainable AI practices. However, the increased efficiency and accessibility of video generation technology also raise concerns about

165 potential misuse. The ability to generate high-quality videos more rapidly could facilitate the creation  
166 of deepfakes, misinformation campaigns, or unauthorized synthetic content that impersonates real  
167 individuals. Additionally, widespread access to efficient video generation tools may impact creative  
168 industries by automating content creation processes, potentially affecting employment in video  
169 production and related fields. We emphasize the importance of developing and deploying appropriate  
170 safeguards, content authentication mechanisms, and ethical guidelines alongside these technological  
171 advances to mitigate potential negative impacts while preserving the beneficial applications of  
172 accelerated video generation.

## 173 **C Visualization**

174 The following qualitative comparison demonstrates that our FPSAttention method generates video  
175 frames that are visually nearly identical to the baseline Wan model with size of 1.3B. This visual  
176 similarity across diverse scenarios—including boats, fish, dogs, desert landscapes, couples, trains,  
177 cars, cats, and robot DJs—validates that our joint FP8 quantization and sparsity optimization achieves  
178 essentially lossless performance while providing substantial computational acceleration.

Table E: Qualitative comparison on the boat group. Prompt: ‘A boat sailing leisurely along the Seine River with the Eiffel Tower in background in super slow motion’ . Top: Baseline; Bottom: FPSAttention.

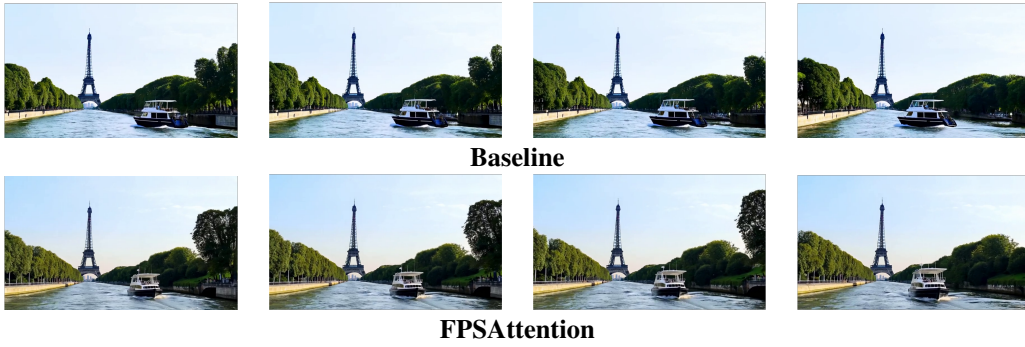

Table F: Qualitative comparison on the fish group. Prompt: ‘Golden fish swimming in the ocean’. Top: Baseline; Bottom: FPSAttention.

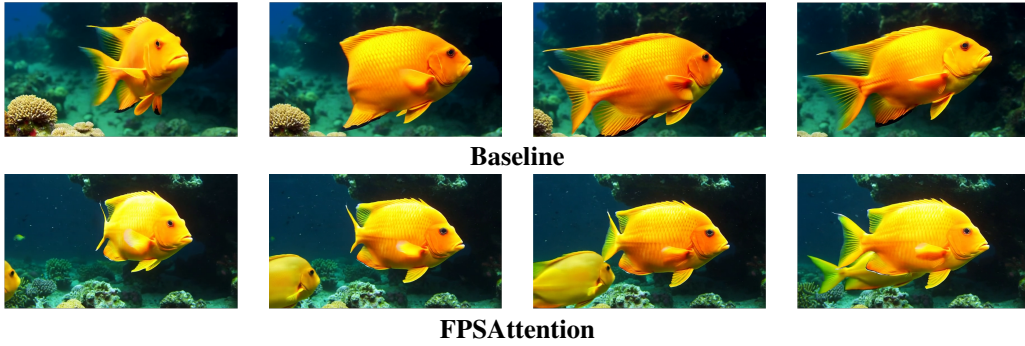

Table G: Qualitative comparison on the dog group. Prompt: ‘A dog enjoying a peaceful walk’. Top: Baseline; Bottom: FPSAttention.

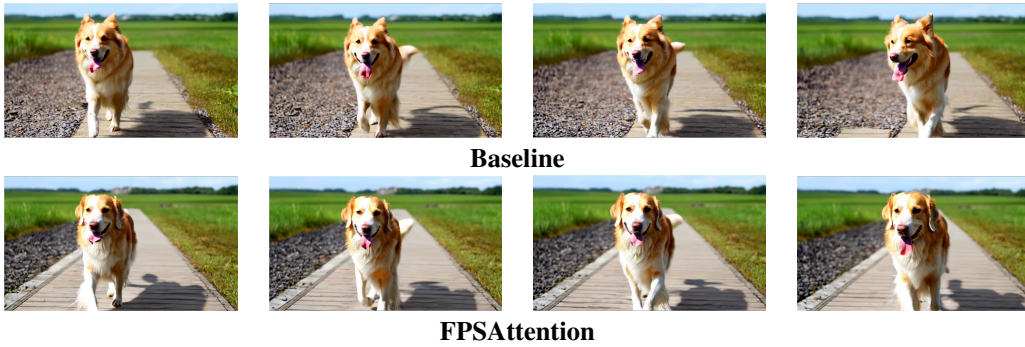



Table H: Qualitative comparison on the desert group. Prompt: ‘Static view on a desert scene with an oasis palm trees and a clear calm pool of water’. Top: Baseline; Bottom: FPSAttention.

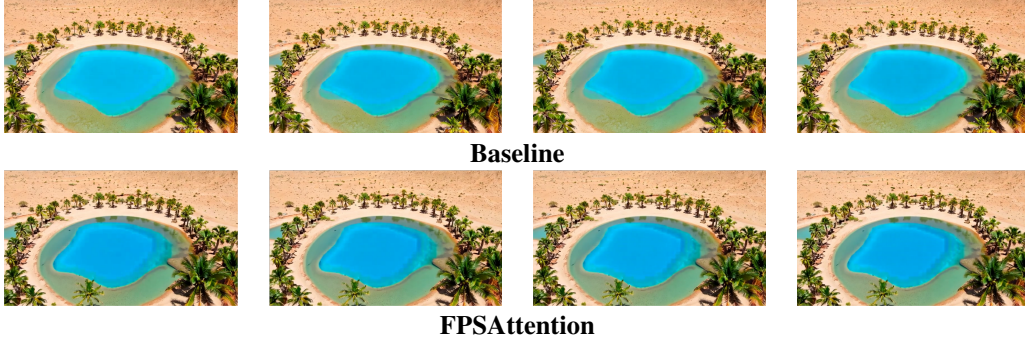

Table I: Qualitative comparison on the couple group. Prompt: ‘A couple in formal evening wear going home get caught in a heavy downpour with umbrellas’. Top: Baseline; Bottom: FPSAttention.

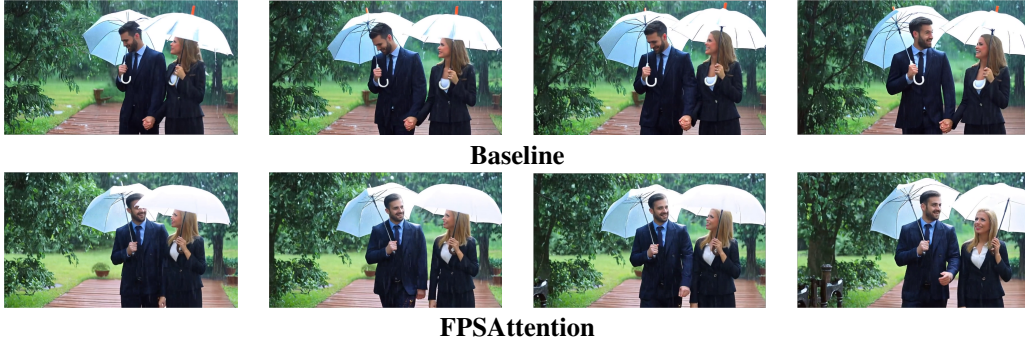

Table J: Qualitative comparison on the train group. Prompt: ‘A train accelerating to gain speed’. Top: Baseline; Bottom: FPSAttention.

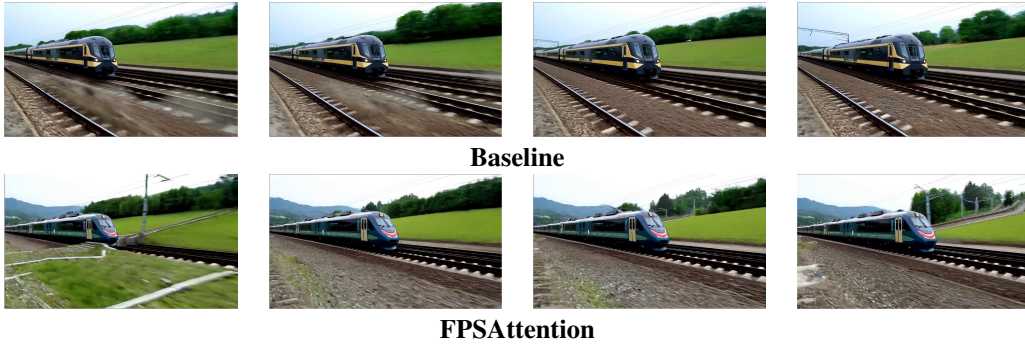



Table K: Qualitative comparison on the rock group. Prompt: ‘A tranquil tableau of at the edge of the Arabian Desert, the ancient city of Petra beckoned with its enigmatic rock-carved façades’. Top: Baseline; Bottom: FPSAttention.

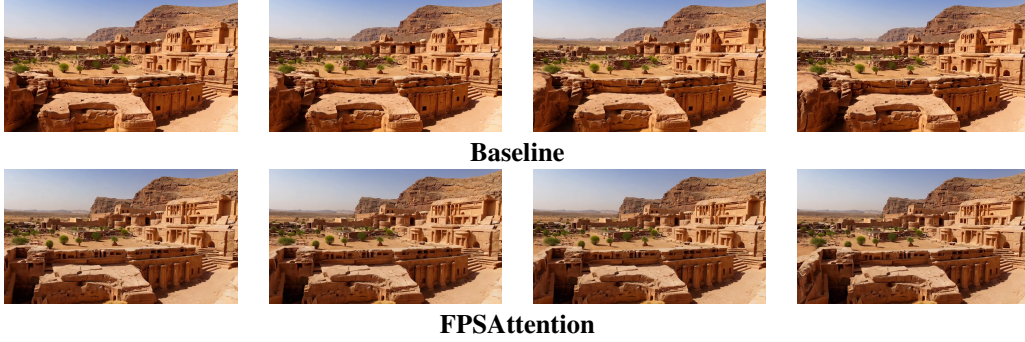

Table L: Qualitative comparison on the nursery group. Prompt: ‘Nursery’. Top: Baseline; Bottom: FPSAttention.

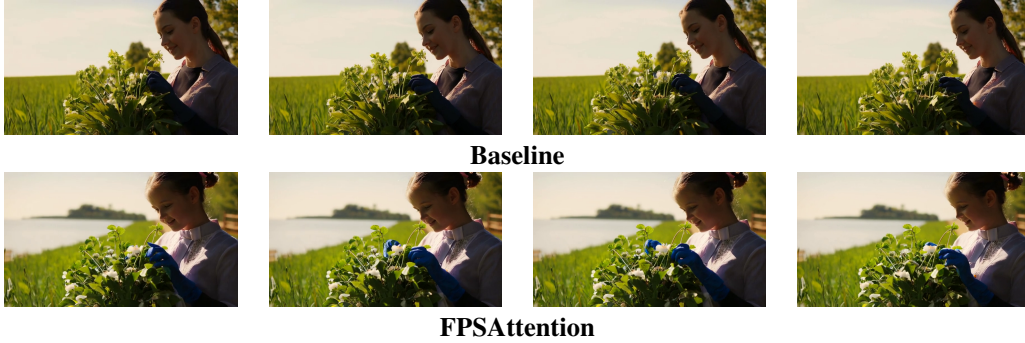

Table M: Qualitative comparison on the snow group. Prompt: ‘Snow rocky mountains peaks canyon. snow blanketed rocky mountains surround and shadow deep canyons. The canyons twist and bend through the high elevat’. Top: Baseline; Bottom: FPSAttention.

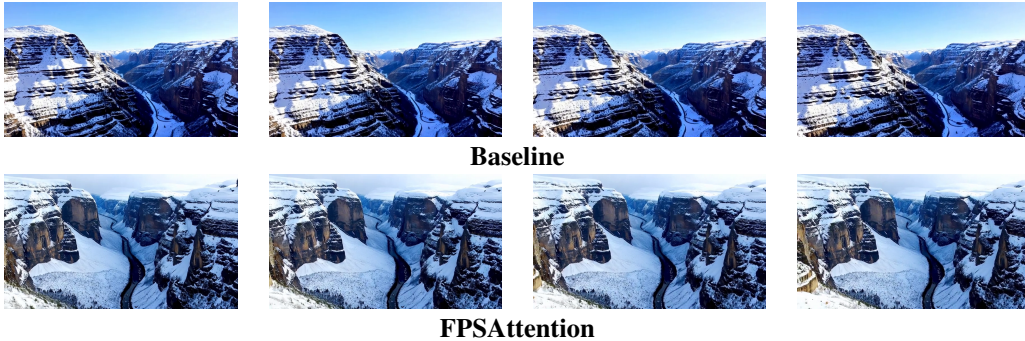

Table N: Qualitative comparison on the book group. Prompt: ‘A person is reading book’. Top: Baseline; Bottom: FPSAttention.

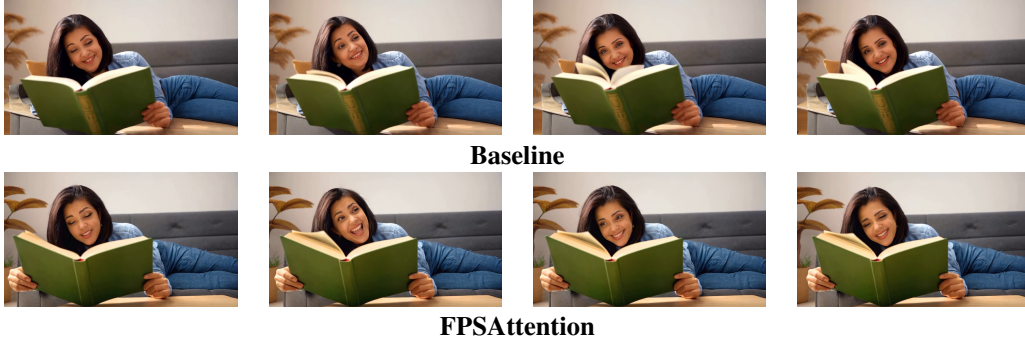

Table O: Qualitative comparison on the space group. Prompt: ‘An astronaut flying in space’. Top: Baseline; Bottom: FPSAttention.

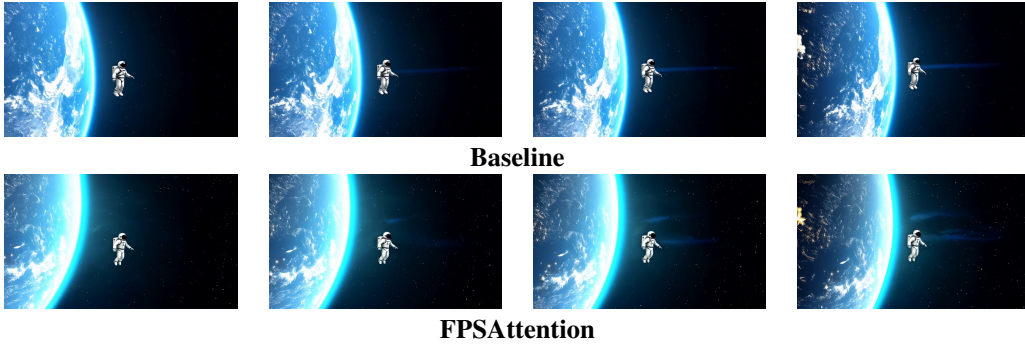

Table P: Qualitative comparison on the panda group. Prompt: ‘A panda drinking coffee in a cafe in Paris’. Top: Baseline; Bottom: FPSAttention.

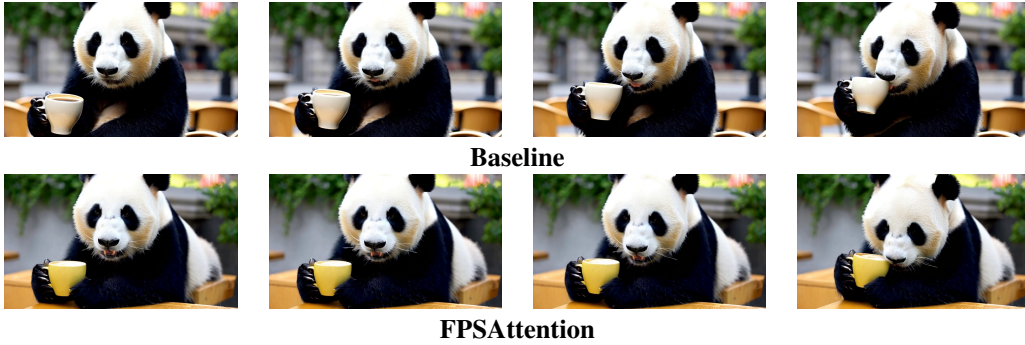

## References

- [1] Alain Hore and Djemel Ziou. Image quality metrics: Psnr vs. ssim. In *2010 20th international conference on pattern recognition*, pages 2366–2369. IEEE, 2010.
- [2] Weijie Kong, Qi Tian, Zijian Zhang, Rox Min, Zuozhuo Dai, Jin Zhou, Jiangfeng Xiong, Xin Li, Bo Wu, Jianwei Zhang, et al. Hunyuanvideo: A systematic framework for large video generative models. *arXiv preprint arXiv:2412.03603*, 2024.
- [3] Muyang Li, Tianle Cai, Jiaxin Cao, Qinsheng Zhang, Han Cai, Junjie Bai, Yangqing Jia, Kai Li, and Song Han. Distrifusion: Distributed parallel inference for high-resolution diffusion models. In *Proceedings of the IEEE/CVF Conference on Computer Vision and Pattern Recognition*, pages 7183–7193, 2024.
- [4] Zefan Li et al. Cogvideox: Text-to-video diffusion models with an expert pipeline. *arXiv preprint arXiv:2408.06072*, 2024.
- [5] Ang Wang, Baole Ai, Bin Wen, Chaojie Mao, Chen-Wei Xie, Di Chen, Feiwu Yu, Haiming Zhao, Jianxiao Yang, Jianyuan Zeng, et al. Wan: Open and advanced large-scale video generative models. *arXiv preprint arXiv:2503.20314*, 2025.
- [6] Zhou Wang, A.C. Bovik, H.R. Sheikh, and E.P. Simoncelli. Image quality assessment: from error visibility to structural similarity. *IEEE Transactions on Image Processing*, 13(4):600–612, 2004.
- [7] Haocheng Xi, Shuo Yang, Yilong Zhao, Chenfeng Xu, Muyang Li, Xiuyu Li, Yujun Lin, Han Cai, Jintao Zhang, Dacheng Li, et al. Sparse videogen: Accelerating video diffusion transformers with spatial-temporal sparsity. *arXiv preprint arXiv:2502.01776*, 2025.
- [8] Jintao Zhang, Haofeng Huang, Pengle Zhang, Jun Zhu, Jianfei Chen, et al. Sageattention: Accurate 8-bit attention for plug-and-play inference acceleration. *arXiv preprint arXiv:2410.02367*, 2024.
- [9] Jintao Zhang, Chendong Xiang, Haofeng Huang, Jia Wei, Haocheng Xi, Jun Zhu, and Jianfei Chen. Spargeattn: Accurate sparse attention accelerating any model inference. *arXiv preprint arXiv:2502.18137*, 2025.
- [10] Peiyuan Zhang, Yongqi Chen, Runlong Su, Hangliang Ding, Ion Stoica, Zhenghong Liu, and Hao Zhang. Fast video generation with sliding tile attention. *arXiv preprint arXiv:2502.04507*, 2025.
- [11] Richard Zhang, Phillip Isola, Alexei A Efros, Eli Shechtman, and Oliver Wang. The unreasonable effectiveness of deep features as a perceptual metric. In *Proceedings of the IEEE conference on computer vision and pattern recognition*, pages 586–595, 2018.
- [12] Xuanlei Zhao, Xiaolong Jin, Kai Wang, and Yang You. Real-time video generation with pyramid attention broadcast. *arXiv preprint arXiv:2408.12588*, 2024.
